# Supplementary material for: Synergistic effects on gene delivery – co-formulation of small disulfide-linked dendritic polycations with Lipofectamine 2000™
Source: Royal Society of Chemistry journal article supplement (doi:10.1039/b818469k), 2009-01-01
Supplement: b818469k.pdf [file b818469k.pdf]

# Supplementary Information

## Synergistic effects on gene delivery – Co-formulation of small disulfide-linked dendritic polycations with lipofectamine 2000<sup>TM</sup>

John G. Hardy,<sup>a</sup> Christine S. Love,<sup>a</sup> Nathan P. Gabrielson,<sup>b</sup> Daniel W. Pack<sup>b</sup> and

David K. Smith<sup>a,\*</sup>

a: Department of Chemistry, University of York, Heslington, York, YO10 5DD, UK

b: Department of Chemical and Biomolecular Engineering, University of Illinois at  
Urbana Champaign, Urbana, IL 61801, USA.

### TABLE OF CONTENTS

|    |                                    |
|----|------------------------------------|
| S2 | Experimental Materials and Methods |
| S4 | References                         |

## **Experimental**

### **Materials**

Cystamine dihydrochloride (**G0-SS-G0**) and 25 kDa poly(ethyleneimine) were purchased from Aldrich and used as supplied. Polyamines based on L-lysine (**G1-SS-G1** and **G2-SS-G2**) were synthesized using methods previously reported by us and fully characterized; all data were in agreement with those previously published.<sup>1</sup> Lipofectamine 2000<sup>TM</sup> and Opti-mem buffer were purchased from Invitrogen and used as supplied.

The MDA-MB-231 human breast carcinoma cell line was purchased from the American Type Culture Collection, and the C2C12 murine myoblast cell line was a gift from Prof. Stephen Kaufman (University of Illinois at Urbana Champaign, IL). All cell lines were maintained according to their respective ATCC protocols at 37°C and 5% CO<sub>2</sub> but were adapted from fetal bovine serum to heat-inactivated horse serum. The 5.3 kilobase pair expression vector, pGL3 (Promega, Madison, WI), containing the luciferase gene driven by the SV40 promoter and enhancer, was grown in DH5 $\alpha$  E. Coli (Gibco BRL, Rockville, MD) and purified using a commercial plasmid purification kit (Bio-Rad, Hercules, CA). Plasmids were further purified by ethanol precipitation; the ratio of absorbances at 260 and 280 nm was 1.8 or greater.

### **Methods**

#### **(i) Gel Retardation Studies**

Appropriate amounts of polyamine and DNA plasmid solutions in 150 mM NaCl (pH 7.3, 20 mM PIPES as buffer) were added to a further 10  $\mu$ L of 150 mM NaCl (pH 7.3, 20 mM PIPES as buffer) to achieve the desired polyamine/DNA ratio. The resultant complexes were incubated at 4°C for 15 min. Then, 3  $\mu$ L Blue/Orange 6X loading dye (Promega, Madison, WI) was added, and the mixtures were incubated at 4°C for a further 5 min. After this time, 15  $\mu$ L was electrophoresed on a 0.75% agarose gel (70 V, 1 h). DNA was visualized with ethidium bromide (Bio-Rad, Hercules, CA). Samples were run in duplicate.

## **(ii) Cell Formation and Transfection**

Lipofectamine 2000<sup>TM</sup>/DNA complexes were prepared at room temperature in Opti-mem buffer according to the manufacturers guidelines, and the desired polyamine/Lipofectamine 2000<sup>TM</sup>/DNA ratio was achieved by addition of a solution of polyamine in Opti-mem buffer, mixing by vortex, and incubation at 4°C for 15 min. Cells were cultured in standard growth medium (DMEM supplemented according to ATCC protocols with 10% horse serum and 1% penicillin streptomycin) and plated in 12-well plates at  $1 \times 10^5$  cells per well 24 h before transfection. Immediately before transfection, the growth medium was replaced with serum-free medium, and 50  $\mu$ L of complex (1  $\mu$ g of plasmid per well) was added to each well. Transfection medium was replaced with growth medium 4 h after transfection. Luciferase expression was quantified 20 h later using a Promega luciferase assay system ( $n \geq 6$ ) according to the manufacturer's protocol. Luciferase activity was measured in relative light units (RLU) using a Lumat LB9507 luminometer (Berthold, GMBH, Germany) and converted to luciferase concentration by comparison with recombinant luciferase standards (Promega). Results were normalized to total cell protein as determined using a Bio-Rad protein assay kit.

## **(iii) Cytotoxicity Determination**

Cytotoxicity was characterized as a decrease in metabolic activity using the XTT assay.<sup>2</sup> Cells were placed in 96-well plates at an initial density of 5000 cells per well in 100  $\mu$ L of growth medium for 24 h, after which time the growth medium was replaced with fresh serum-free medium. At this point a solution of: polyamine alone (5  $\mu$ g of polyamine per well), polyamine/DNA complexes (1  $\mu$ g of DNA and 5  $\mu$ g of polyamine per well), or polyamine/Lipofectamine 2000<sup>TM</sup>/DNA (effective transfection conditions): 40  $\mu$ g of polyamine, 0.1  $\mu$ g of DNA and 0.25  $\mu$ g of Lipofectamine 2000<sup>TM</sup> in 10  $\mu$ L of Opti-mem buffer was added to each well. Cells were incubated for 4 h, and the medium was replaced with complete growth medium for 16 h. Fresh XTT (1 mg/mL) and the coenzyme Q0 (80 mg/mL) stock were prepared each day in PBS (0.5  $\mu$ g/ $\mu$ L XTT and 0.04  $\mu$ g/ $\mu$ L coenzyme Q0), and 25  $\mu$ L aliquots were added to each well. The samples were incubated for a further 4 h at

37°C, and the absorbance was read at 450 nm relative to blank well prepared without cells (n = 16).

## References

- 1 (a) C. S. Love, V. Chechik, D. K. Smith and C. Brennan, *J. Mater. Chem.* 2004, **14**, 919-923. (b) C. S. Love, A. R. Hirst, V. Chechik, D. K. Smith, I. Ashworth, C. Brennan, *Langmuir* 2004, **20**, 6580-6585. (c) C. S. Love, V. Chechik, D. K. Smith, K. Wilson, I. Ashworth and C. Brennan, *Chem. Commun.* 2005, 1971-1973.
- 2 M. G. Stevens and S. Olsen, *J. Immunol. Methods* 1993, **157**, 225-231.
